# Supplementary material
Source: HighWire-hosted journal article supplement (https://erj.ersjournals.com/content/57/3/2004077)
Supplement: inline-supplementary-material-1 [file inline-supplementary-material-1.pdf]

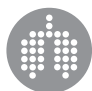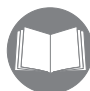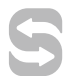

SHAREABLE PDF

# Targeted next-generation sequencing: a Swiss army knife for mycobacterial diagnostics?

Sagal Mohamed<sup>1</sup>, Claudio U. Köser <sup>2</sup>, Max Salfinger<sup>3</sup>, Wladimir Sougakoff<sup>4</sup> and Scott K. Heysell<sup>1</sup>

**Affiliations:** <sup>1</sup>Division of Infectious Diseases and International Health, University of Virginia Charlottesville, Charlottesville, VA, USA. <sup>2</sup>Dept of Genetics, University of Cambridge, Cambridge, UK. <sup>3</sup>University of South Florida College of Public Health and Morsani College of Medicine, Tampa, FL, USA. <sup>4</sup>Sorbonne Université, INSERM U1135, CIMI-Paris, APHP, Hôpital Pitié-Salpêtrière, NRC-MyRMA, Paris, France.

**Correspondence:** Max Salfinger, University of South Florida College of Public Health, 13201 Bruce B. Downs Blvd, MDC 56, Tampa, FL 33612, USA. E-mail: max@usf.edu

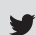

@ERSpublications

Like a multifunctional Swiss army knife, Deeplex offers unprecedented versatility directly from the clinical sample and represents a welcome addition to the diagnostic and epidemiological toolbox <https://bit.ly/38s6ukF>

**Cite this article as:** Mohamed S, Köser CU, Salfinger M, *et al*. Targeted next-generation sequencing: a Swiss army knife for mycobacterial diagnostics? *Eur Respir J* 2021; 57: 2004077 [<https://doi.org/10.1183/13993003.04077-2020>].

This single-page version can be shared freely online.

The genus *Mycobacterium* encompasses almost 200 species that fall into four main groups [1]. Specifically, the *Mycobacterium tuberculosis* complex (MTBC), the causative agent of tuberculosis (TB) and leading cause of death by a single infectious agent, is distinguished from mycobacteria causing Buruli ulcer and leprosy [2, 3]. The remaining species are referred to as nontuberculous mycobacteria (NTM), which mainly cause lung disease and have become more frequent in many parts of the world, particularly amongst older patients [4].
